# Supplementary figures and images for: Induction of Broad Immunity against Invasive Salmonella Disease by a Quadrivalent Combination Salmonella MAPS Vaccine Targeting Salmonella Enterica Serovars Typhimurium, Enteritidis, Typhi, and Paratyphi A
Source: MDPI journal article supplement (doi:10.3390/vaccines11111671), 2023-10-31

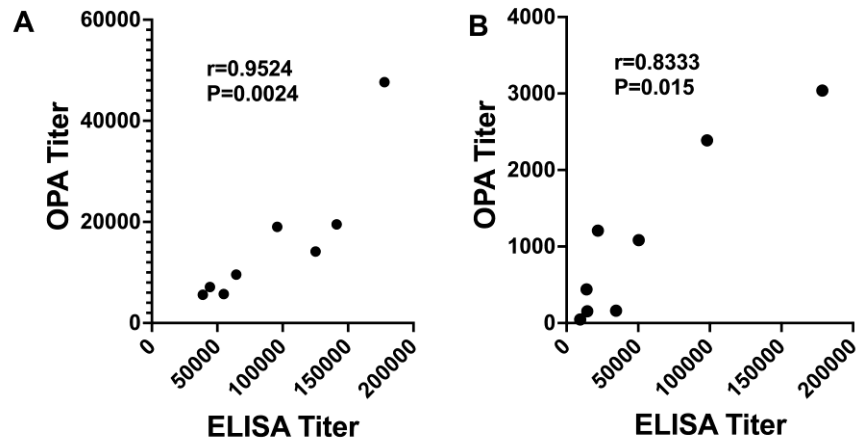

Figure S1. Correlation between ELISA titer and OPA titer for *S. Typhimurium* (A) and *S. Enteritidis* (B).

Supplement: s1 [file s1]
